# Supplementary material
Source: Research Square preprint supplement (doi:10.21203/rs.3.rs-8984012/v1)
Supplement: Supplementary file 1 [file 730dc2a569247007af505f45.xlsx]

## Sheet: preds
smiles	Compound_Name	Unnamed: 2	molecular_weight	logP	hydrogen_bond_acceptors	hydrogen_bond_donors	Lipinski	QED	stereo_centers	tpsa	PAINS_alert	BRENK_alert	NIH_alert	AMES	BBB_Martins	Bioavailability_Ma	CYP1A2_Veith	CYP2C19_Veith	CYP2C9_Substrate_CarbonMangels	CYP2C9_Veith	CYP2D6_Substrate_CarbonMangels	CYP2D6_Veith	CYP3A4_Substrate_CarbonMangels	CYP3A4_Veith	Carcinogens_Lagunin	ClinTox	DILI	HIA_Hou	NR-AR-LBD	NR-AR	NR-AhR	NR-Aromatase	NR-ER-LBD	NR-ER	NR-PPAR-gamma	PAMPA_NCATS	Pgp_Broccatelli	SR-ARE	SR-ATAD5	SR-HSE	SR-MMP	SR-p53	Skin_Reaction	hERG	Caco2_Wang	Clearance_Hepatocyte_AZ	Clearance_Microsome_AZ	Half_Life_Obach	HydrationFreeEnergy_FreeSolv
O=S(NC1=C(C=CC=N2)C2=CC=C1)(C3=CC=C(C4=CC=CC=C4)C=C3)=O	Hit4		360.43800000000005	4.702600000000004	3	1	4	0.5736312757058089	0	59.06	0	0	0	0.0450449	0.734003	0.923279	0.785264	0.821087	0.518853	0.784614	0.112858	0.175799	0.445989	0.477614	0.218696	0.0983516	0.966353	0.999931	0.00697241	0.0496173	0.332439	0.162979	0.0465679	0.28483	0.0492119	0.846317	0.629781	0.267227	0.0592564	0.0287299	0.480766	0.0709209	0.203704	0.538177	-4.98977	58.5806	48.7835	55.8203	-12.0204
O=S(NC1=C(C=CC=N2)C2=CC=C1)(C3=CC=C(C4=CC=NC=C4)C=C3)=O	Hit1		361.42600000000004	4.0976000000000035	4	1	4	0.5939702028001672	0	71.95	0	0	0	0.0302028	0.589821	0.908274	0.856721	0.857925	0.337872	0.715502	0.0764792	0.453933	0.329133	0.917107	0.135581	0.151254	0.953793	0.999988	0.00388915	0.0368601	0.496512	0.343779	0.0283914	0.148241	0.00997707	0.762886	0.29801	0.220075	0.049085	0.0504149	0.233204	0.0468153	0.127059	0.628018	-5.13991	37.8711	26.2169	49.8179	-14.5772
O=S(NC1=C(C=CC=N2)C2=CC=C1)(C3=CC=C(C4=CC=CO4)C=C3)=O	Hit2		350.39900000000006	4.295600000000003	4	1	4	0.5956328909096117	0	72.2	0	0	0	0.0368199	0.745607	0.916065	0.832383	0.859653	0.460381	0.777741	0.114324	0.292974	0.416239	0.639747	0.18568	0.106585	0.956035	0.999968	0.00525592	0.0392286	0.364571	0.198833	0.0298959	0.196921	0.0251832	0.850135	0.479766	0.21846	0.0410041	0.0326282	0.34728	0.0487183	0.185014	0.536604	-4.96914	50.0647	38.0356	55.5838	-12.8567
O=S(NC1=C(C=CC=N2)C2=CC=C1)(C3=CC=C(C)C=C3)=O	Hit3		298.367	3.3440200000000013	3	1	4	0.8064339888988321	0	59.06	0	0	0	0.026612	0.790742	0.914484	0.783852	0.860043	0.431812	0.740347	0.130981	0.184351	0.435662	0.595614	0.150439	0.0790492	0.922975	0.999981	0.00368645	0.030889	0.249395	0.137786	0.020592	0.147837	0.0119281	0.895358	0.309741	0.134988	0.020608	0.0240616	0.221065	0.0200376	0.186082	0.445731	-4.95323	65.3063	45.7871	24.2222	-11.5952
[truncated: 57 more columns]
