# Supplementary material
Source: Research Square preprint supplement (doi:10.21203/rs.3.rs-8984012/v1)

**Supporting information**

**NMR spectrum of compounds**


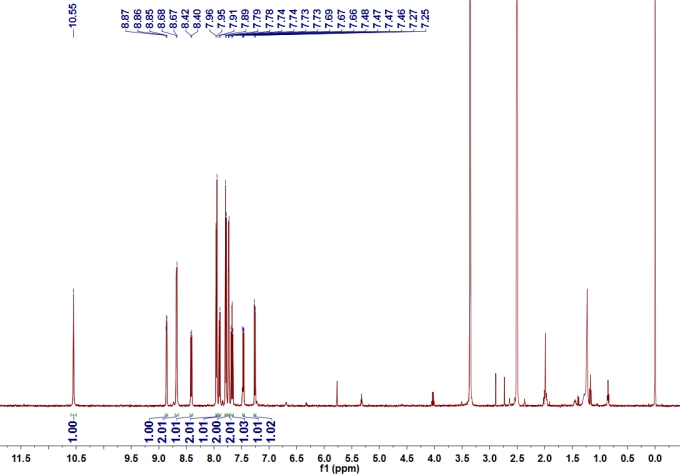

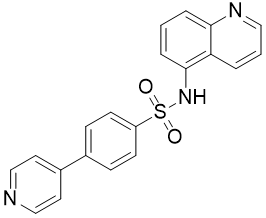

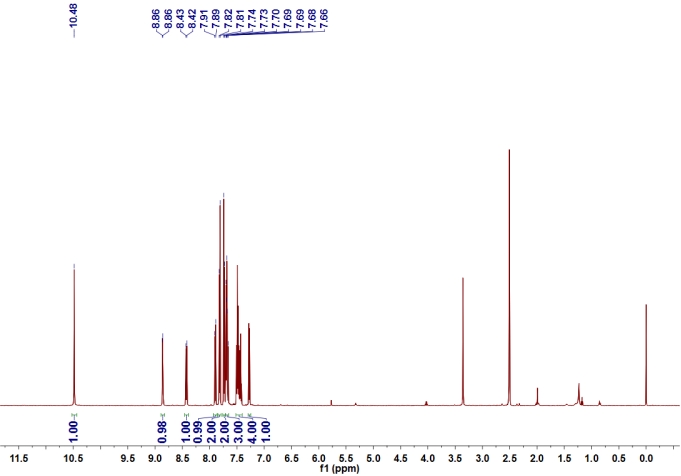

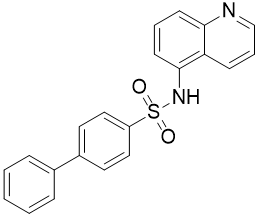

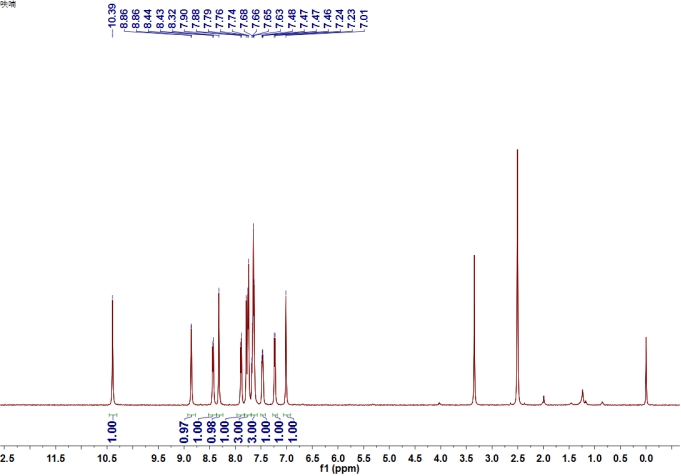

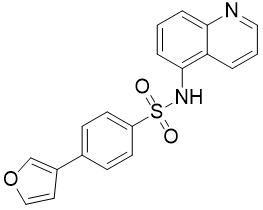

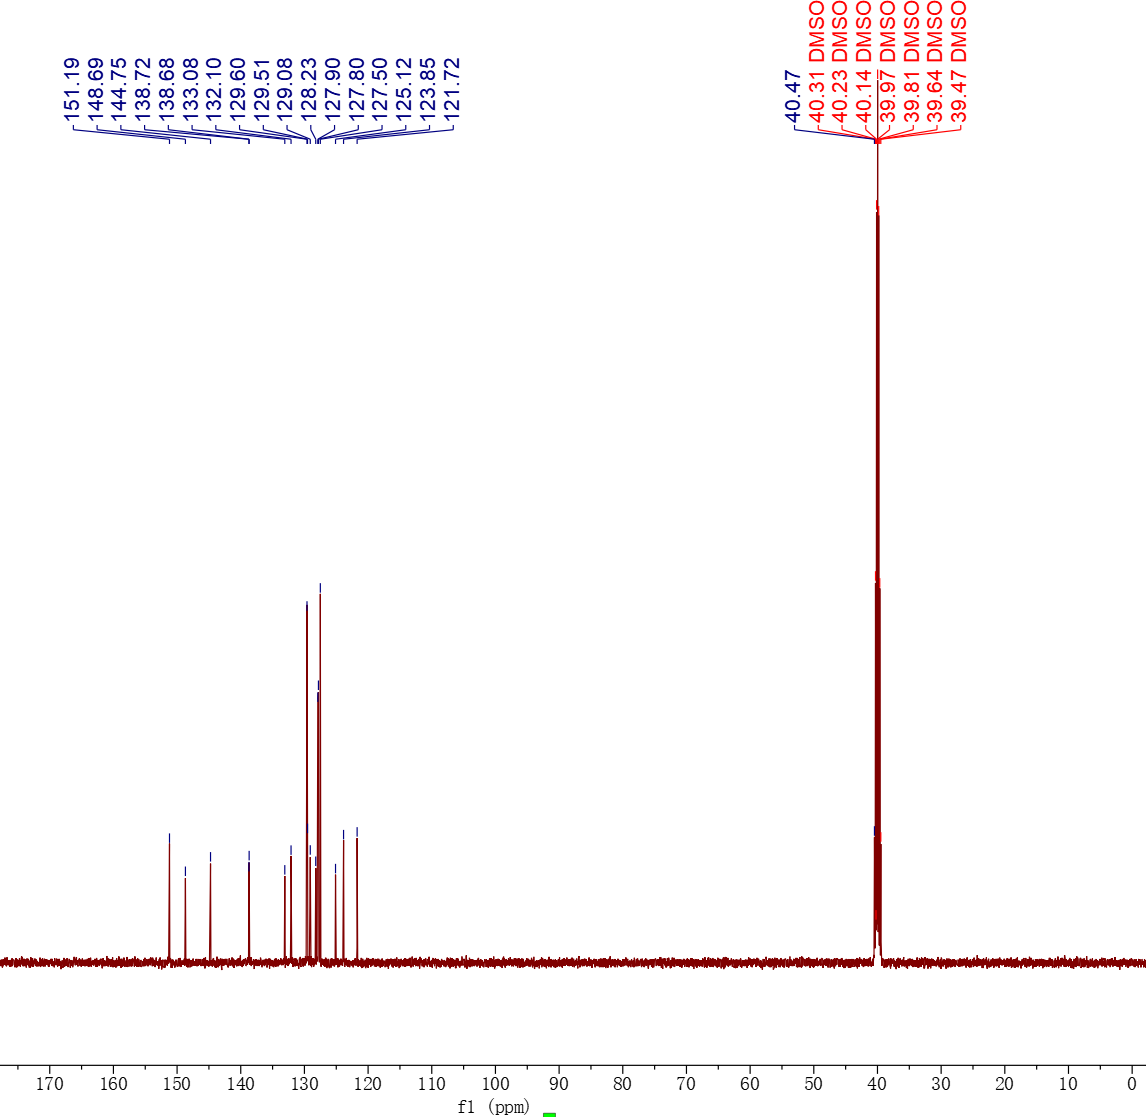

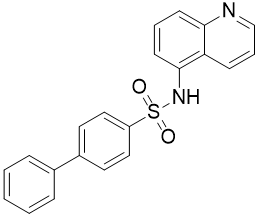


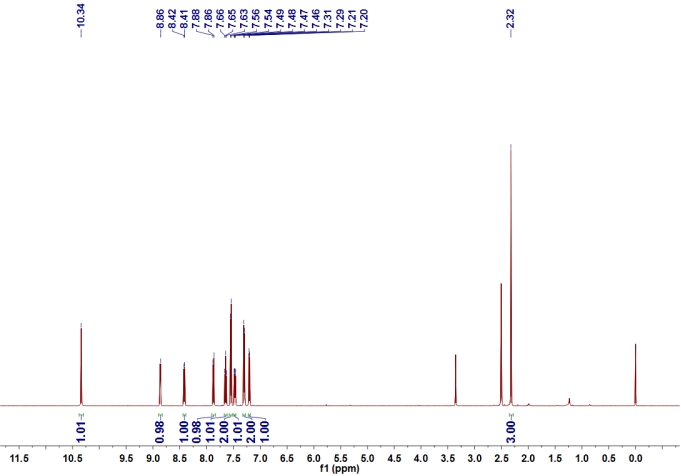

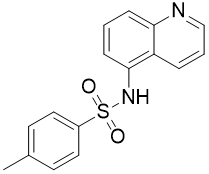


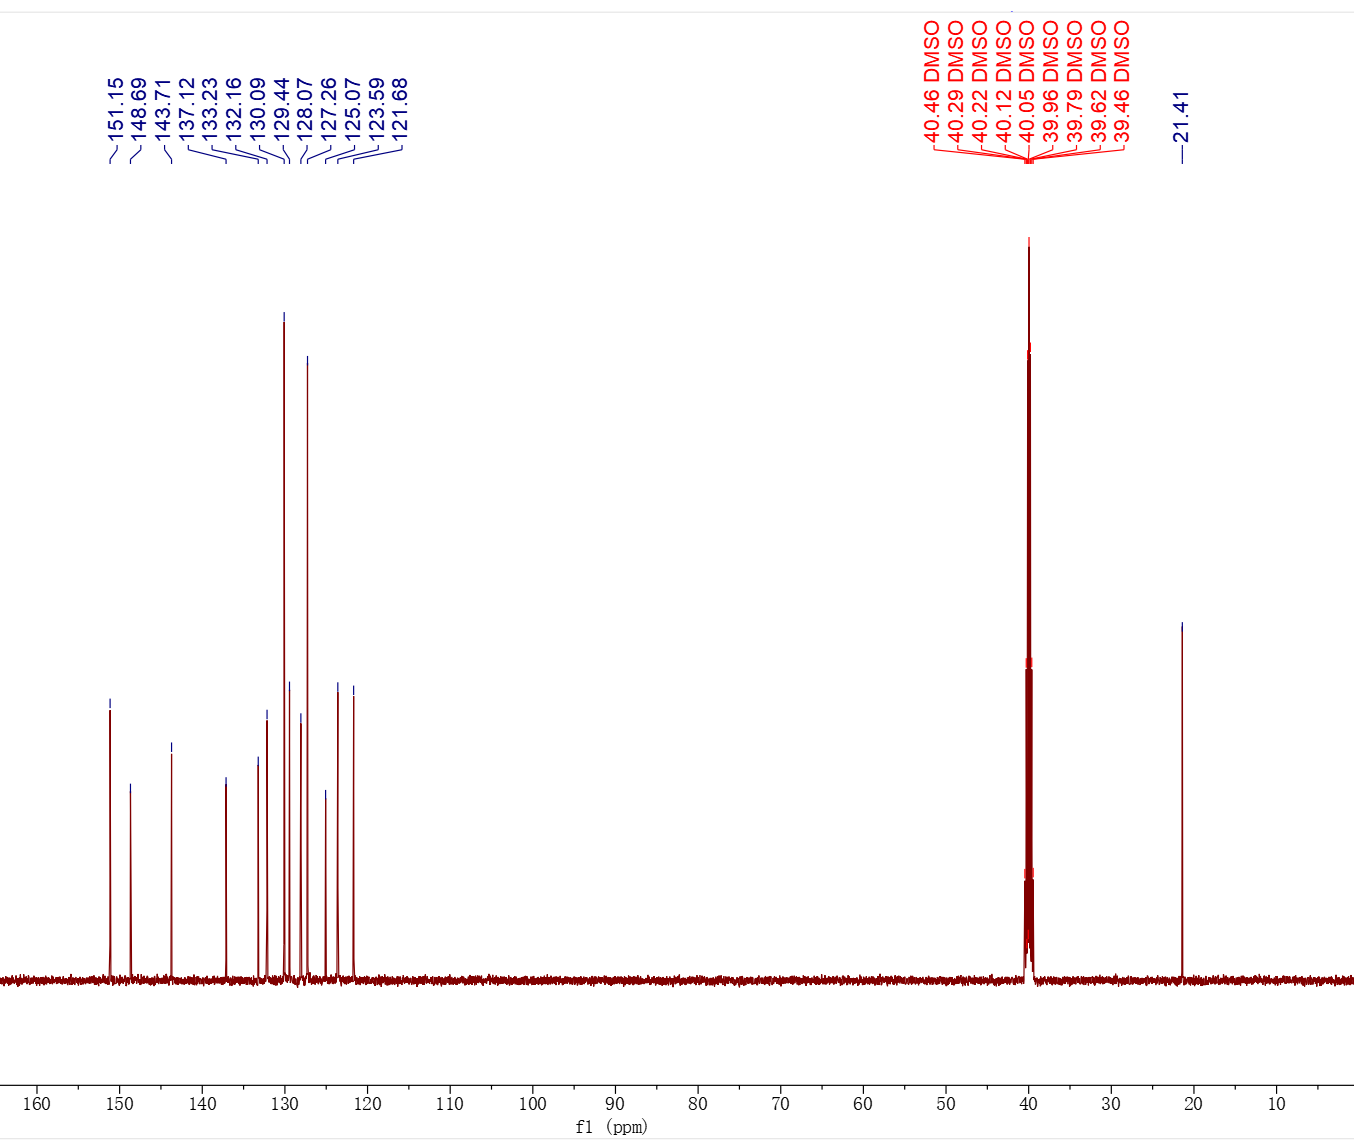

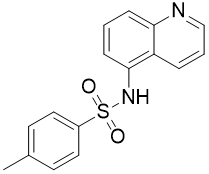

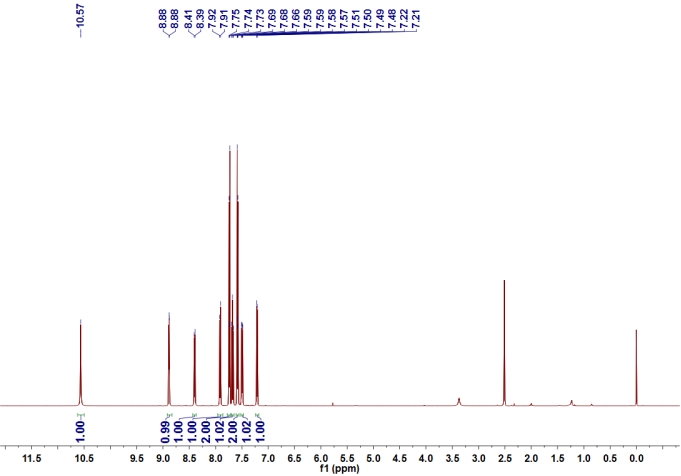

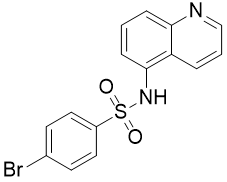

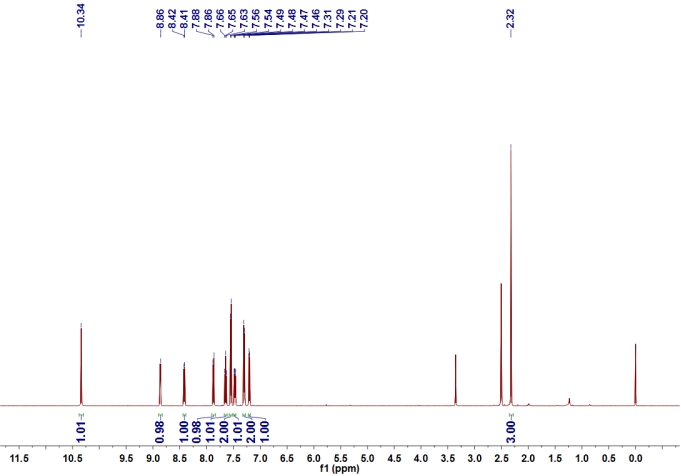

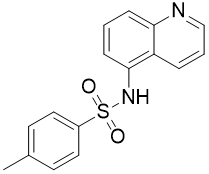

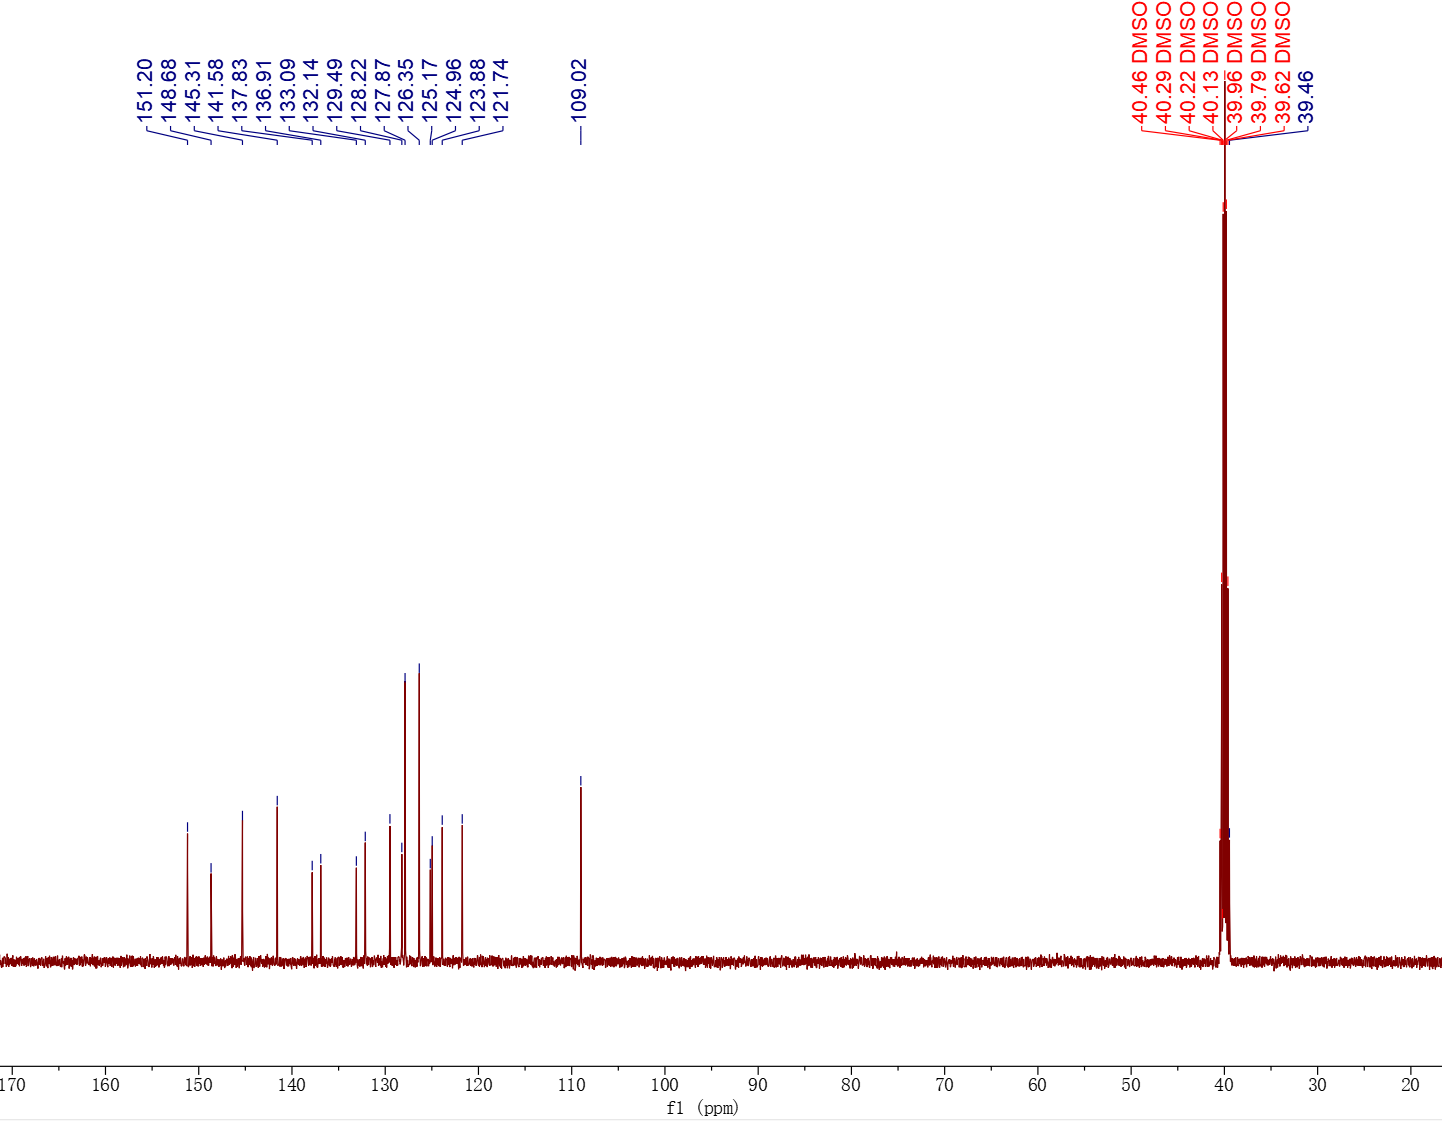

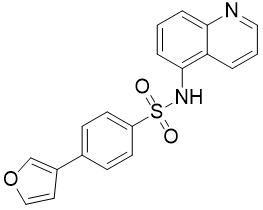

Supplement: Supplementary file 2 [file ce0ca490c6d9579483d3e821.docx]
